# Supplementary material for: Impact of urban heat island on inorganic aerosol in the lower free troposphere: a case study in Hangzhou, China
Source: Copernicus journal article supplement (doi:10.5194/acp-2022-93), 2022-02-28
Supplement: Supplementary file 1 [file acp-2022-93-supplement.pdf]

Supplement of

## Impact of urban heat island on inorganic aerosol in the lower free troposphere: a case study in Hangzhou, China

Hanqing Kang et al.

Correspondence to: Bin Zhu (binzhu@nuist.edu.cn) and Bu Yu (fengying5457@163.com)

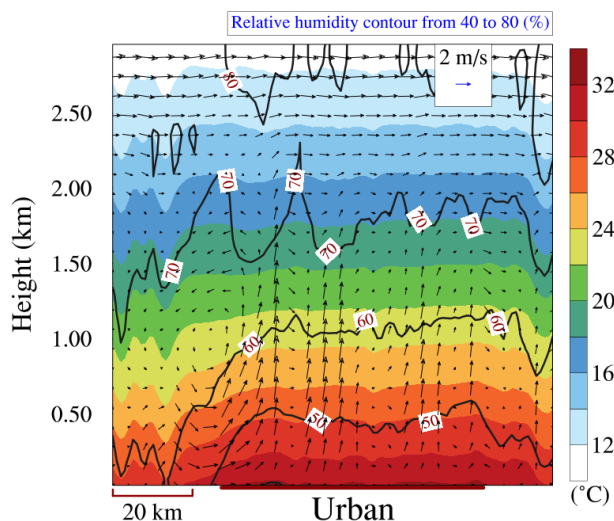

**Figure S1.** Averaged (12:00–17:00 LT September 18, 2017) vertical cross section of air temperature (filled colors), relative humidity (solid contour lines), and in-plane vectors (arrows), where vertical speed is expanded by 10 times, in CTL simulation.

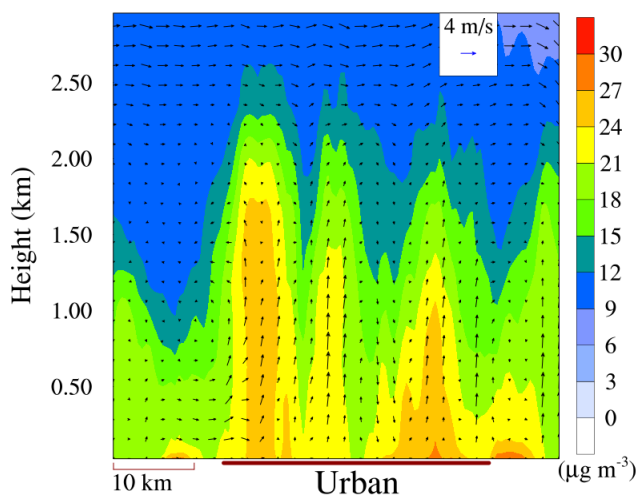

**Figure S2.** Averaged (12:00–17:00 LT September 18, 2017) vertical cross section of PM<sub>2.5</sub> concentration (filled colors) and in-plane vectors (arrows), where vertical speed is expanded by 10 times, in CTL simulation.
